# Supplementary material for: Research on the on-line determination of formaldehyde gas by the gas–liquid phase chemiluminescence method
Source: Royal Society of Chemistry journal article supplement (doi:10.1039/d2ra03175b), 2022-01-01
Supplement: d2ra03175b1.pdf [file d2ra03175b1.pdf]

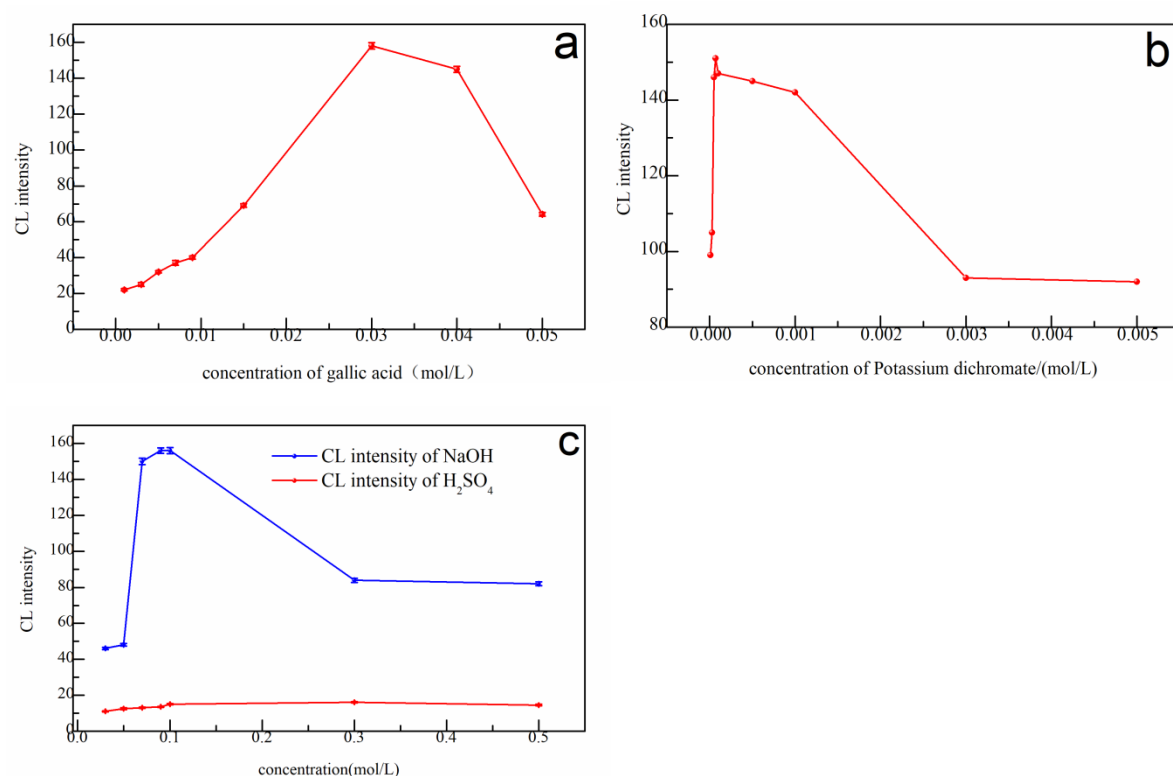

**Fig S1** (a)Effect of gallic acid concentration on chemiluminescence intensity;(b) Effect of potassium dichromate concentration on chemiluminescence intensity; (c) Effect of NaOH and H<sub>2</sub>SO<sub>4</sub> concentration on chemiluminescence intensitydifference spectrum.

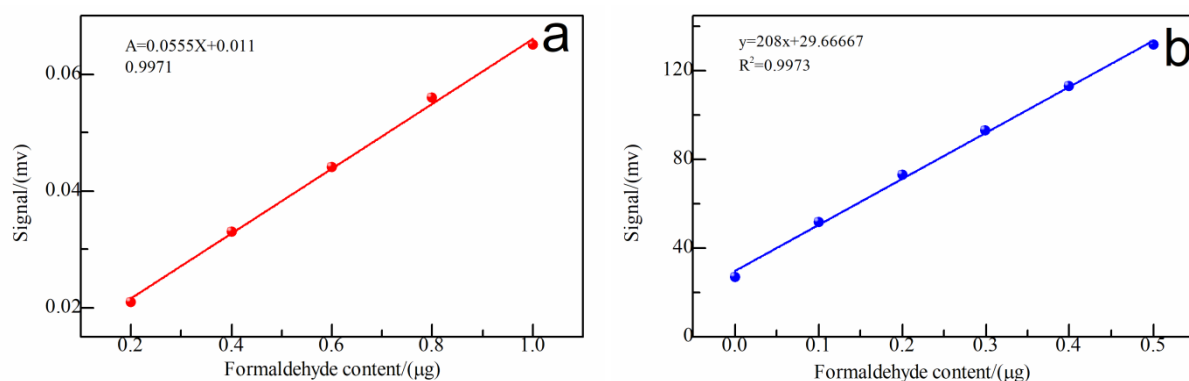

**Fig S2** (a) Standard curve of national standard phenol reagent;(b) Standard curve of gas-liquid chemiluminescence system.
